# Supplementary material
Source: MDPI journal article supplement (https://www.mdpi.com/search?q=antibiotics-08-00247)
Supplement: s001 [file antibiotics-08-00247-s001.pdf]

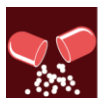

# Anti-Tubercular Activity of Substituted 7-Methyl and 7-Formylindolizines and *in Silico* Study for Prospective Molecular Target Identification

Katharigatta N. Venugopala <sup>1,2,\*</sup>, Christophe Tratrat <sup>1</sup>, Melendhran Pillay <sup>3</sup>, Fawzi M. Mahomoodally <sup>4</sup>, Subhrajyoti Bhandary <sup>5</sup>, Deepak Chopra <sup>5</sup>, Mohamed A. Morsy <sup>1,6</sup>, Michelyne Haroun <sup>1</sup>, Bandar E. Aldhubiab <sup>1</sup>, Mahesh Attimarad <sup>1</sup>, Anroop B. Nair <sup>1</sup>, Nagaraja Sreeharsha <sup>1</sup>, Rashmi Venugopala <sup>7</sup>, Sandeep Chandrashekarappa <sup>8,\*</sup>, Osama I. Alwassil <sup>9</sup>, Bharti Odhav <sup>2</sup>

<sup>1</sup> Department of Pharmaceutical Sciences, College of Clinical Pharmacy, King Faisal University, Al-Ahsa 31982, Kingdom of Saudi Arabia; kvenugopala@kfu.edu.sa (K.N.V.); ctratrat@kfu.edu.sa (C.T.); momorsy@kfu.edu.sa (M.A.M.); mharoun@kfu.edu.sa (M.H.); baldhubiab@kfu.edu.sa (B.E.A.); mattimarad@kfu.edu.sa (M.A.); anair@kfu.edu.sa (A.B.N.); sharsha@kfu.edu.sa (N.S.)

<sup>2</sup> Department of Biotechnology and Food Technology, Durban University of Technology, Durban 4001, South Africa; odhavb@dut.ac.za (B.O.)

<sup>3</sup> Department of Microbiology, National Health Laboratory Services, KZN Academic Complex, Inkosi Albert Luthuli Central Hospital, Durban 4001, South Africa; melendhra.pillay@nhls.ac.za

<sup>4</sup> Department of Health Sciences, Faculty of Science, University of Mauritius, Réduit, Mauritius; f.mahomoodally@uom.ac.mu (F.M.M.)

<sup>5</sup> Department of Chemistry, Indian Institute of Science Education and Research Bhopal, Indore By-pass Road, Bhaury, Bhopal 462 066, Madhya Pradesh, India; subhb@iiserb.ac.in (S.B.); dchopra@iiserb.ac.in (D.C.)

<sup>6</sup> Department of Pharmacology, Faculty of Medicine, Minia University, El-Minia 61511, Egypt

<sup>7</sup> Department of Public Health Medicine, University of KwaZulu-Natal, Howard College Campus, Durban 4001, South Africa; venugopalar@ukzn.ac.za (R.V.)

<sup>8</sup> Institute for Stem Cell Biology and Regenerative Medicine, NCBS, TIFR, GKVK, Bellary Road, Bangalore 560 065, India; sandeepc@instem.res.in (S.C.)

<sup>9</sup> Department of Pharmaceutical Sciences, College of Pharmacy, King Saud bin Abdulaziz University for Health Sciences, Riyadh, Kingdom of Saudi Arabia; wassilo@ksau-hs.edu.sa (O.I.A.)

\* Correspondence: kvenugopala@kfu.edu.sa; Tel.: +966 1358 98842 (K.N.V.); sandeepc@instem.res.in; Tel.: +91 94 4863 9413 (S.C.)

## Table of Contents.

| Sl. No. | Contents                                                                                        | Page No. |
|---------|-------------------------------------------------------------------------------------------------|----------|
| S1      | FT-IR of ethyl 3-(4-bromobenzoyl)-7-formyl-2-methylindolizine-1-carboxylate (4)                 | 3        |
| S2      | <sup>1</sup> H-NMR of ethyl 3-(4-bromobenzoyl)-7-formyl-2-methylindolizine-1-carboxylate (4)    | 4        |
| S3      | <sup>13</sup> C-NMR of ethyl 3-(4-bromobenzoyl)-7-formyl-2-methylindolizine-1-carboxylate (4)   | 5        |
| S4      | FT-IR of methyl 3-(4-fluorobenzoyl)-7-methyl-2-phenylindolizine-1-carboxylate (5)               | 6        |
| S5      | <sup>1</sup> H-NMR of methyl 3-(4-fluorobenzoyl)-7-methyl-2-phenylindolizine-1-carboxylate (5)  | 7        |
| S6      | <sup>13</sup> C-NMR of methyl 3-(4-fluorobenzoyl)-7-methyl-2-phenylindolizine-1-carboxylate (5) | 8        |

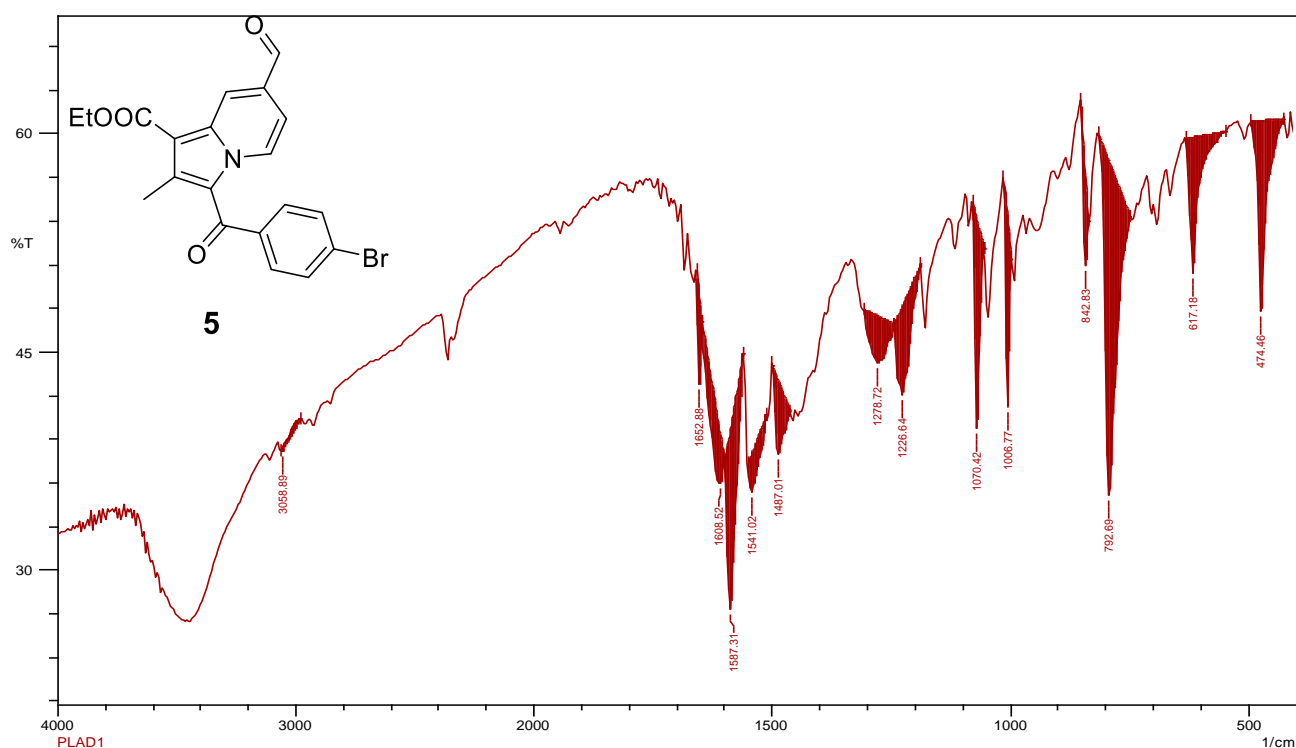

S1: FT-IR of ethyl 3-(4-bromobenzoyl)-7-formyl-2-methylindolizine-1-carboxylate (4).

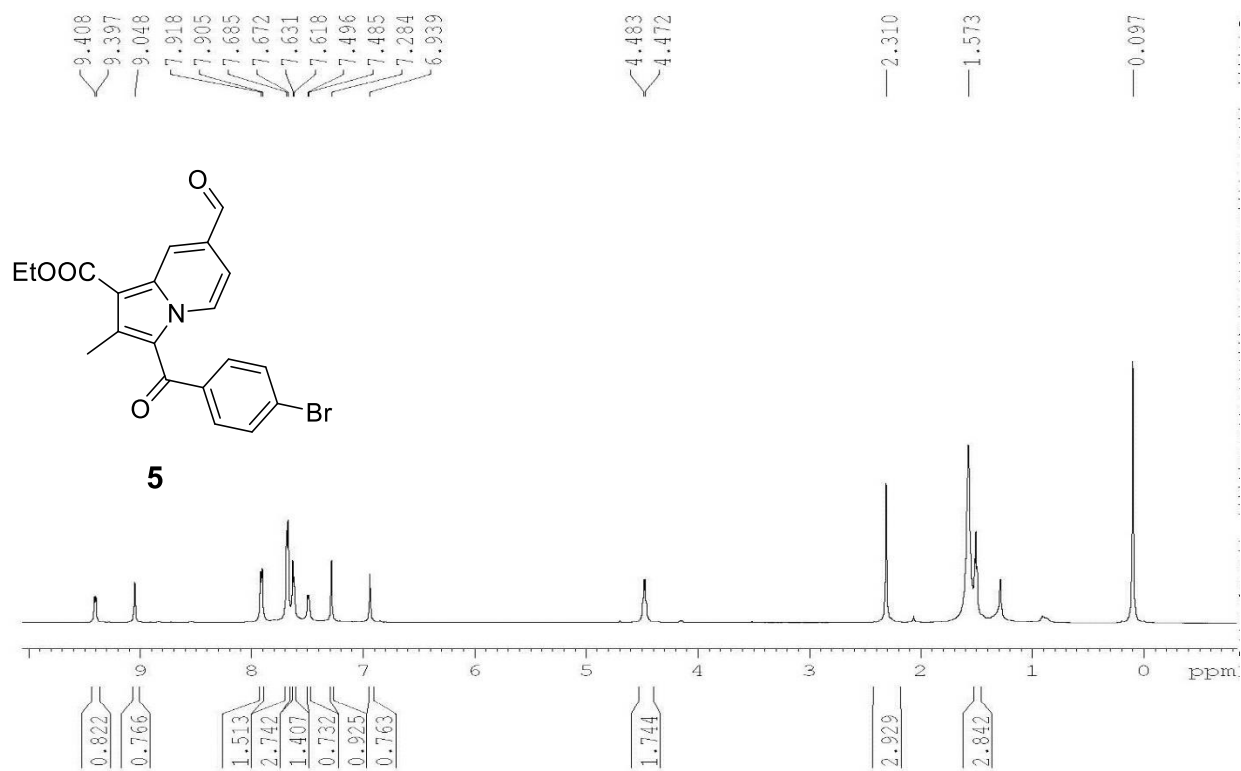S2: <sup>1</sup>H-NMR of ethyl 3-(4-bromobenzoyl)-7-formyl-2-methylindolizine-1-carboxylate (4).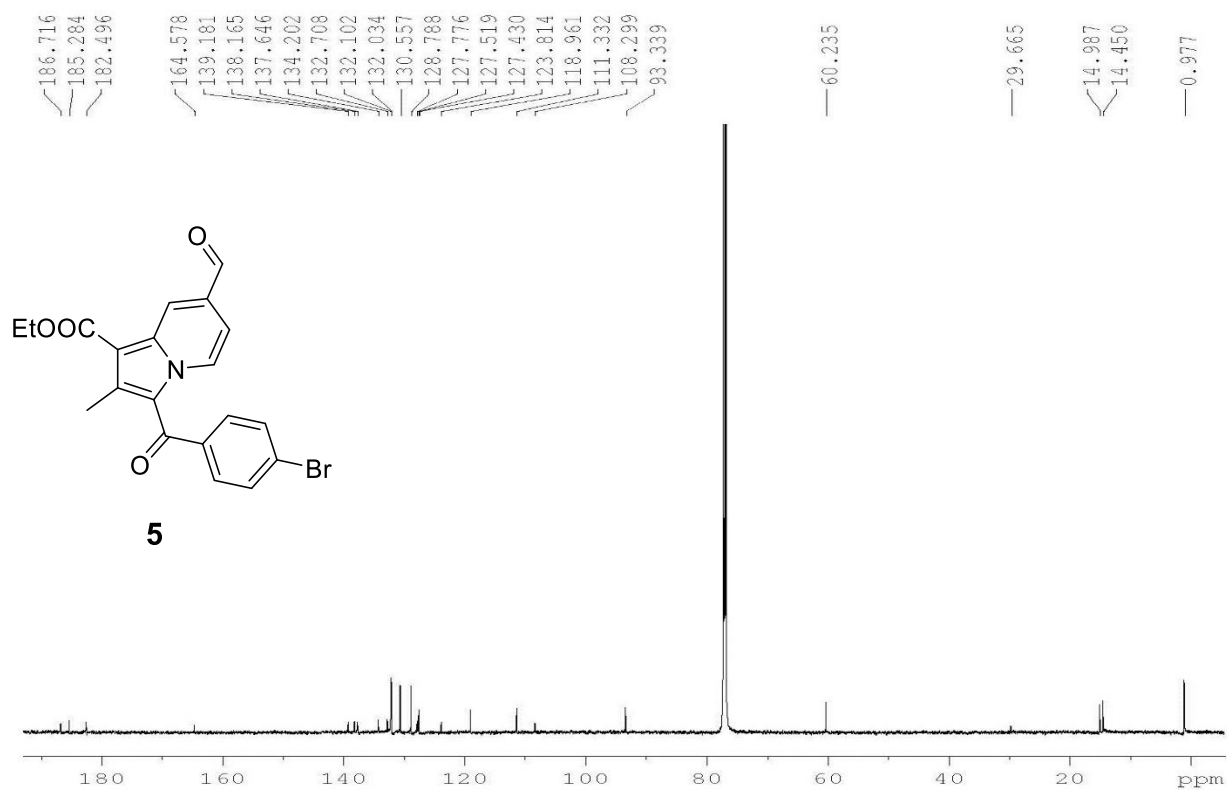S3: <sup>13</sup>C-NMR of ethyl 3-(4-bromobenzoyl)-7-formyl-2-methylindolizine-1-carboxylate (4).

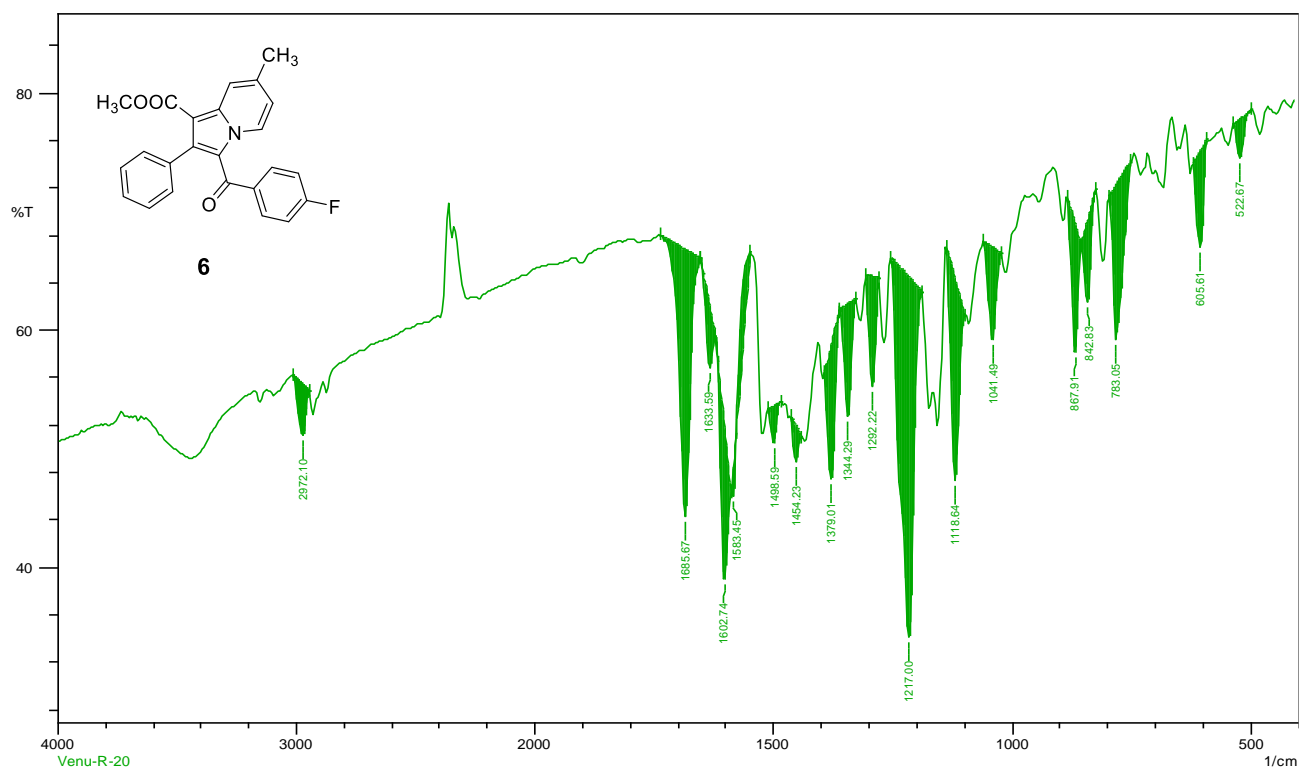

S4: FT-IR of methyl 3-(4-fluorobenzoyl)-7-methyl-2-phenylindolizine-1-carboxylate (5).

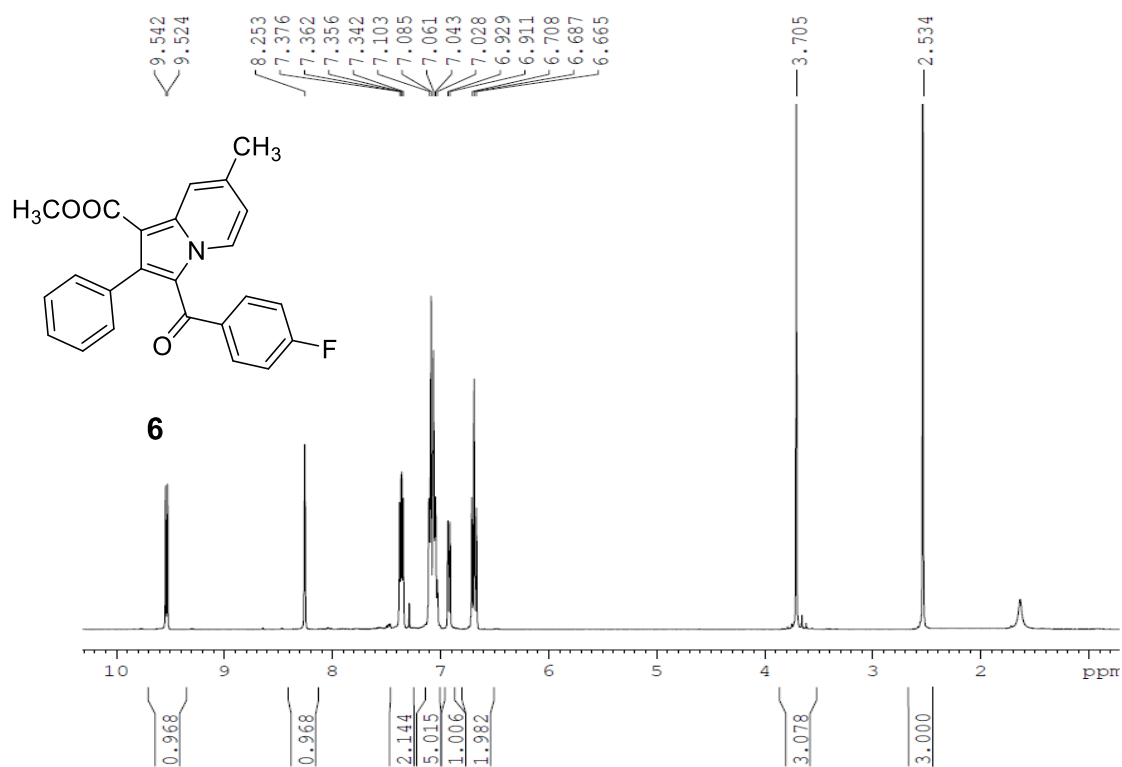

S5: <sup>1</sup>H-NMR of methyl 3-(4-fluorobenzoyl)-7-methyl-2-phenylindolizine-1-carboxylate (5).

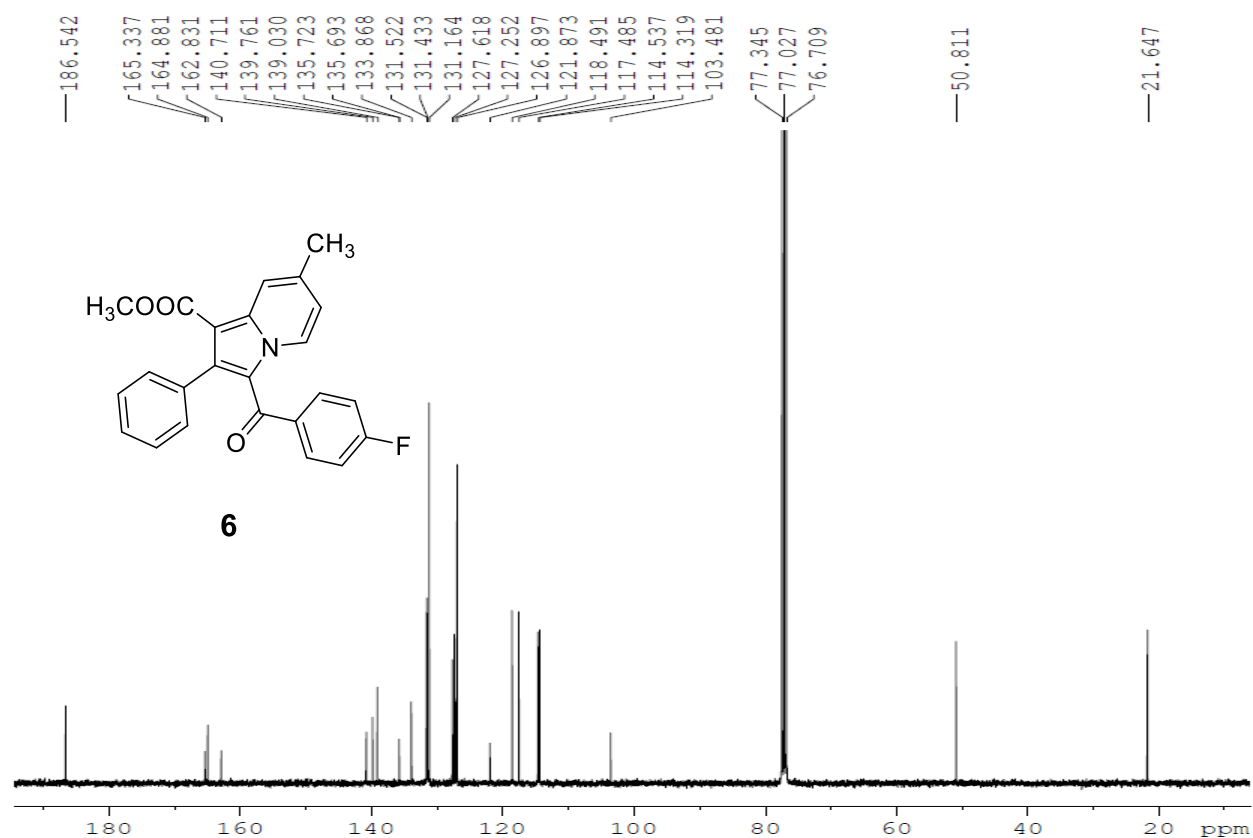

S6:  $^{13}\text{C}$ -NMR of methyl 3-(4-fluorobenzoyl)-7-methyl-2-phenylindolizine-1-carboxylate (5).
